# Supplementary material
Source: MDPI journal article supplement (https://www.mdpi.com/2673-9976/6/1/119)
Supplement: s1 [file s1]

## INTRODUCTION

Pulsed electric fields (PEF) is an innovative technology that allows the creation of pores in the cell membrane through the application of an electric field. Among its main advantages, the increase in the extraction performance of intracellular compounds stands out.

## OBJECTIVES

EVALUATE THE EFFICIENCY OF EXTRACTION ASSISTED BY PEF COMBINED WITH SUPPLEMENTARY EXTRACTION USING DIFFERENT BINARY MIXTURES TO RECOVER HIGH ADDED VALUE COMPOUNDS FROM SPIRULINA MICROALGAE.

## MATERIALS & METHODS

Extraction process:

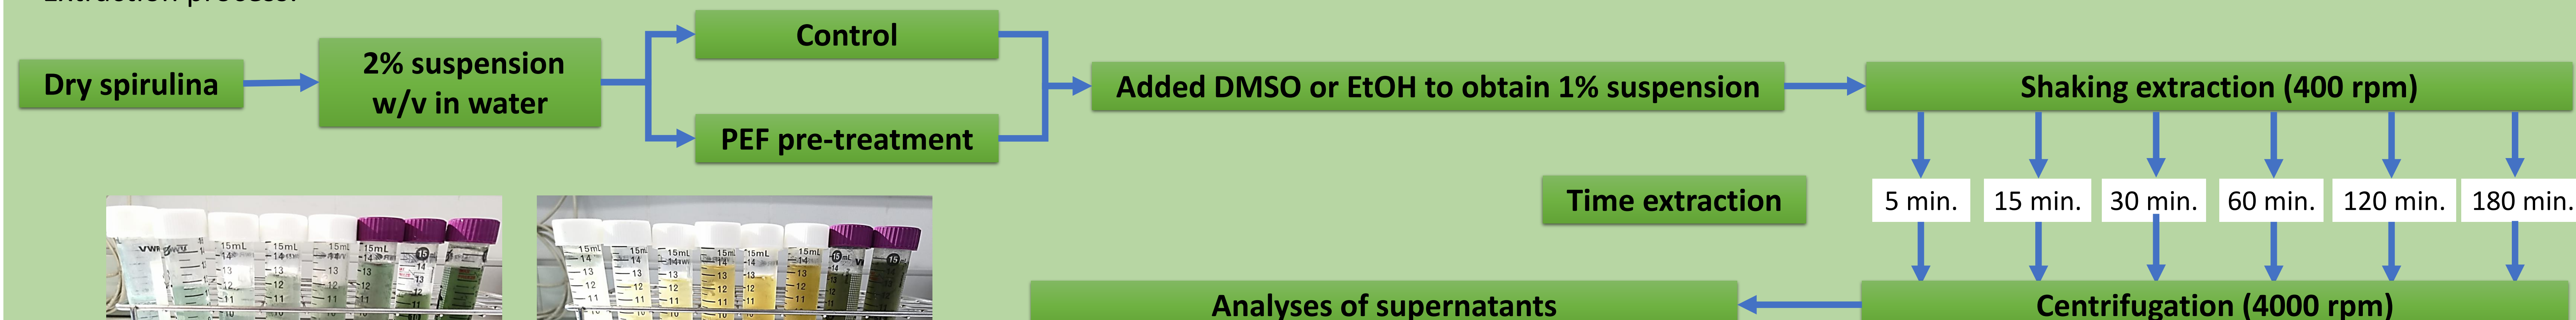

PEF-Treatment

-3 kV/cm and 100 kJ/kg.

-2% (w/v) suspension of the *Arthrospira platensis* microalgae.

Chlorophyll a, chlorophyll b and carotenoids contents were estimated spectrophotometrically according to the study by Parniakov et al. [1]. They were calculated using the equations of Lichtenthaler & Wellburn [2] for EtOH and Wellburn [3] for DMSO.

## RESULTS AND DISCUSSION

**Figure 1a** shows the results obtained after applying both treatments (conventional and PEF) using the mixture EtOH/H<sub>2</sub>O. **Figure 1b** shows the results obtained for chlorophyll, carotenoids content after conventional and PEF-assisted extraction using DMSO/H<sub>2</sub>O as solvent. The best results were obtained using 50% (v/v) ethanol as solvent. In addition, a greater extraction of pigments was observed in the samples pre-treated with PEF. This was especially noticeable at lower extraction times (4).

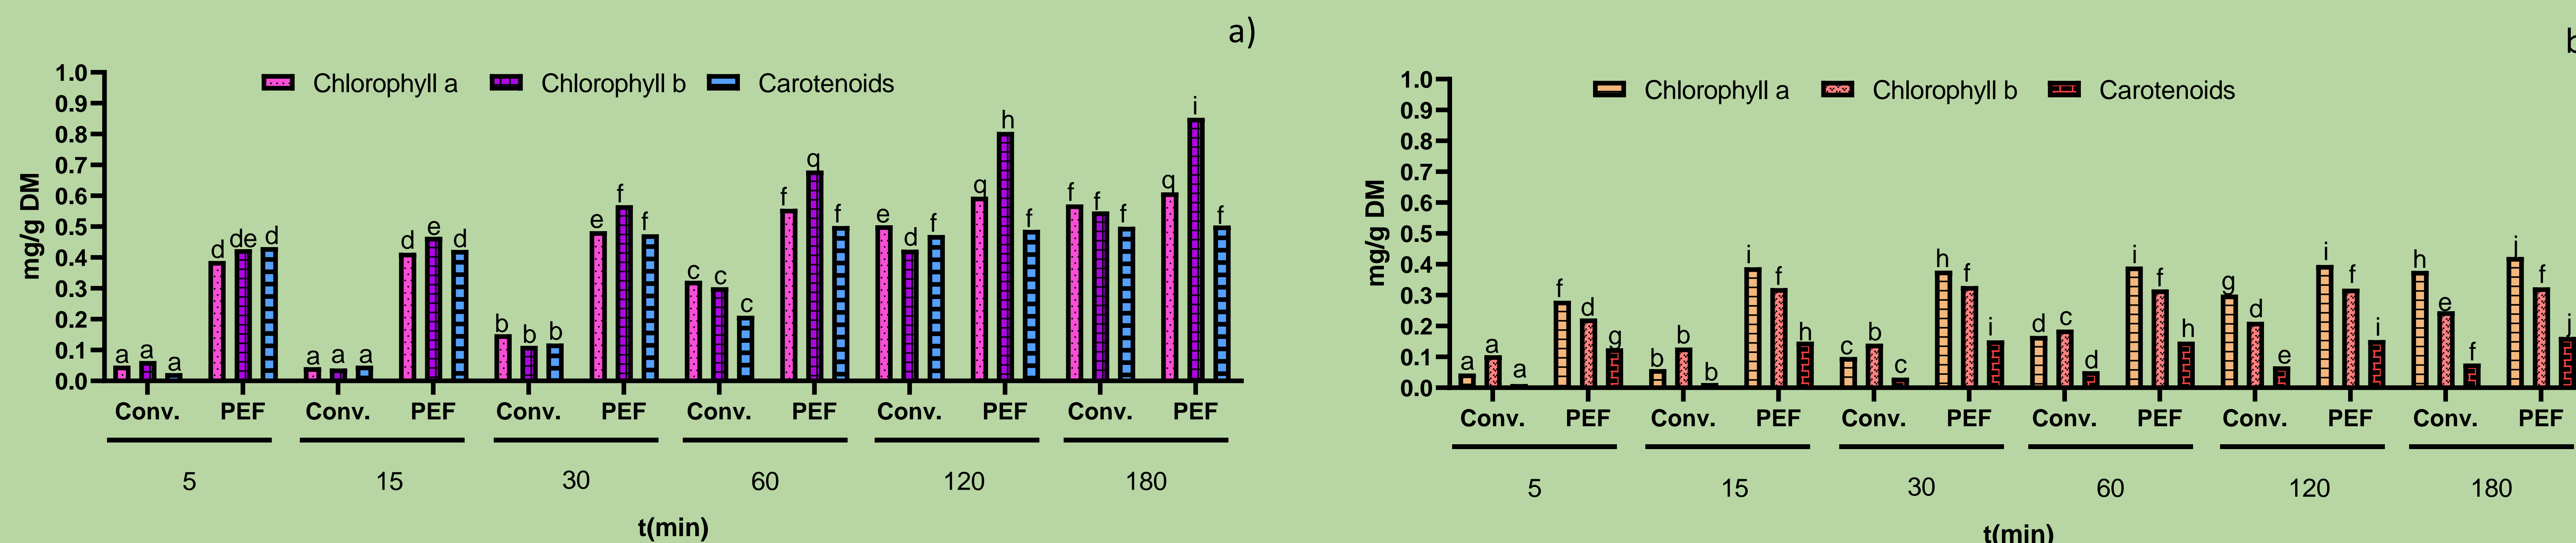

**Figure 1.** Chlorophyll a, chlorophyll b and carotenoids content EtOH/H<sub>2</sub>O (a); DMSO/H<sub>2</sub>O (b) after conventional extraction and PEF-assisted extraction. Different lower-case letters in the same parameter indicate statistical differences depending on the extraction time or treatment used.

## CONCLUSIONS

PEF is a promising technology for pigment extraction as it is environmentally friendly while improving the profitability of the process.

## Acknowledgements

Francisco J. Martí-Quijal would like to thank the pre-PhD scholarship program of the University of Valencia, “Atracció de Talent”. The authors would also like to thank Generalitat Valenciana for the financial support (IDIFEDER/2018/046-Procesos innovadores de extracción y conservación: pulsos eléctricos y fluidos supercríticos) through European Union ERDF funds (European Regional Development Fund).

## REFERENCES

- Parniakov, O.; Apicella, E.; Koubaa, M.; Barba, F.J.; Grimi, N.; Lebovka, N.; Pataro, G.; Ferrari, G.; Vorobiev, E. Ultrasound-assisted green solvent extraction of high-added value compounds from microalgae *Nannochloropsis* spp. *Bioresour. Technol.* **2015**, *198*, 262–267.
- Lichtenthaler, H.; Wellburn, A. Determinations of total carotenoids and chlorophylls a and b of leaf extracts in different solvents. *Biochem. Soc. Trans.* **1983**, *11*, 591–592.
- Wellburn, A.R. The spectral determination of chlorophylls a and b, as well as total carotenoids, using various solvents with spectrophotometers of different resolution. *J. Plant Physiol.* **1994**, *144*, 307–313.
- Parniakov, O.; Barba, F.J.; Grimi, N.; Marchal, L.; Jubeau, S.; Lebovka, N.; Vorobiev, E. Pulsed electric field assisted extraction of nutritionally valuable compounds from microalgae *Nannochloropsis* spp. using the binary mixture of organic solvents and water. *Innov. Food Sci. Emerg. Technol.* **2015**, *27*, 79–85.
